# Supplementary material
Source: PubMed Central journal article supplement (PMC9798525)
Supplement: NIHMS1856579-supplement-1.pdf [file NIHMS1856579-supplement-1.pdf]

**Supplementary Tables/Figures**

**Supplementary Figure 1: Spaghetti plot of daily coffee consumption from baseline to 6 months (N=282)**

**Change in Coffee Intake from Baseline to 6 Months**

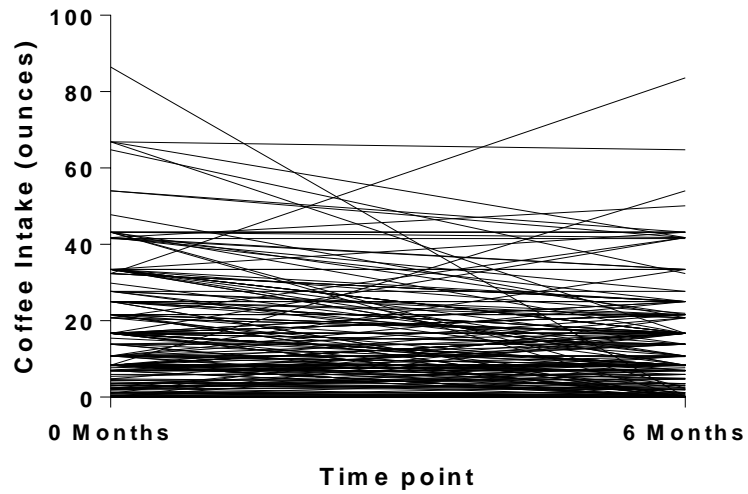

Each line represents a single patient

**Supplementary Table 1: Daily Consumption of Caffeine Sources by Grade Progression**

| <b>Beverage<br/>(oz/day)</b> | <b>Average Daily Consumption (mean, STD)</b> |                        |                    |                |
|------------------------------|----------------------------------------------|------------------------|--------------------|----------------|
|                              | <b>All Patients</b>                          | <b>Non-Progressors</b> | <b>Progressors</b> | <b>P-value</b> |
| <b>Coffee</b>                | 14.65 (15.53)                                | 14.07 (14.86)          | 17.14 (18.1)       | 0.12           |
| <b>Black Tea</b>             | 3.6 (0.97)                                   | 3.57 (7.96)            | 3.75 (8.34)        | 0.86           |
| <b>Green Tea</b>             | 1.39 (3.68)                                  | 1.42 (3.53)            | 1.23 (4.3)         | 0.68           |
| <b>Herbal Tea</b>            | 0.23 (1.34)                                  | 0.26 (1.44)            | 0.1 (0.69)         | 0.34           |
| <b>Soda</b>                  | 3.35 (7.81)                                  | 3.38 (7.99)            | 3.23 (7.01)        | 0.88           |

**Supplementary Table 2: Association\* of tea, soda, coffee, and caffeine intake\*\* with progression-free survival in prostate cancer patients on active surveillance.**

| Dietary Source       | Number of Patients | Hazard Ratio | 95% Confidence Interval | P-Value |
|----------------------|--------------------|--------------|-------------------------|---------|
| <b>Black Tea</b>     |                    |              |                         |         |
| None                 | 213                | 1.00         | Ref                     |         |
| 0.004-3.58 oz/day    | 91                 | 1.03         | 0.57-1.86               | 0.91    |
| >3.58 oz/day         | 107                | 1.33         | 0.66-1.95               | 0.65    |
| <b>Green Tea</b>     |                    |              |                         |         |
| None                 | 274                | 1.00         | Ref                     |         |
| 0.004-1.55 oz/day    | 65                 | 0.96         | 0.50-1.82               | 0.89    |
| >1.55 oz/day         | 72                 | 0.68         | 0.33-1.39               | 0.29    |
| <b>Herbal Tea</b>    |                    |              |                         |         |
| None                 | 370                | 1.00         | Ref                     |         |
| 0.004-1.94 oz/day    | 20                 | 0.62         | 0.15-2.56               | 0.51    |
| >1.94 oz day         | 21                 | 0.28         | 0.04-2.01               | 0.21    |
| <b>Soda</b>          |                    |              |                         |         |
| None                 | 239                | 1.00         | Ref                     |         |
| 0.004-4.76 oz/day    | 92                 | 0.75         | 0.42-1.36               | 0.35    |
| >4.76 oz/day         | 80                 | 1.33         | 0.74-2.40               | 0.34    |
| <b>Coffee</b>        |                    |              |                         |         |
| 0-2.39 oz/day        | 107                | 1.00         | Ref                     |         |
| 2.40-8.36 oz/day     | 108                | 0.57         | 0.28-1.17               | 0.13    |
| 8.37-21.6 oz/day     | 105                | 0.87         | 0.46-1.65               | 0.67    |
| >21.6 oz/day         | 91                 | 1.27         | 0.69-2.34               | 0.44    |
| <b>Caffeine</b>      |                    |              |                         |         |
| 0-66.38 mg/day       | 102                | 1.00         | Ref                     |         |
| 66.39-116.44 mg/day  | 103                | 1.18         | 0.57-2.42               | 0.66    |
| 116.45-248.14 mg/day | 104                | 1.20         | 0.61-2.38               | 0.59    |
| >248.14 mg/day       | 102                | 1.63         | 0.85-3.14               | 0.14    |

\*Each model accounts for age, PSA and summary tumor length

\*\*Categorical variables defined as never consumers in referent category and split at median in consumers for teas and soda; natural/population-based quartiles examined for coffee and caffeine.

**Supplementary Table 3: Correlation of coffee intake with other diet, lifestyle, and patient factors**

|                     | Spearman's rho | <i>P</i>         |
|---------------------|----------------|------------------|
| Black Tea           | -0.01          | <i>0.90</i>      |
| Green Tea           | -0.08          | <i>0.13</i>      |
| Herbal Tea          | -0.06          | <i>0.24</i>      |
| Soda                | -0.05          | <i>0.30</i>      |
| Caffeine            | 0.92           | <i>&lt;0.001</i> |
| Dairy Cream or Milk | 0.09           | <i>0.08</i>      |
| Added sugar         | 0.02           | <i>0.70</i>      |
| Alcohol             | 0.17           | <i>&lt;0.001</i> |
| Total energy intake | 0.10           | <i>0.03</i>      |
| BMI                 | -0.00          | <i>0.94</i>      |
| Testosterone level  | -0.00          | <i>0.98</i>      |
| Age                 | 0.01           | <i>0.81</i>      |
